# Supplementary material for: A Novel Nitrobenzoate Microtubule Inhibitor that Overcomes Multidrug Resistance Exhibits Antitumor Activity
Source: PubMed Central journal article supplement (PMC4980604; doi:10.1038/srep31472), 2016-08-11
Supplement: srep31472-s1.pdf [file srep31472-s1.pdf]

**A Novel Nitrobenzoate Microtubule Inhibitor that Overcomes  
Multidrug Resistance Exhibits Antitumor Activity**

**Yan-Bo Zheng, Jian-Hua Gong, Xiu-Jun Liu, Shu-Ying Wu, Yi Li, Xian-Dong Xu, Bo-Yang  
Shang, Jin-Ming Zhou, Zhi-Ling Zhu, Shu-Yi Si & Yong-Su Zhen\***

Institute of Medicinal Biotechnology, Chinese Academy of Medical Sciences and  
Peking Union Medical College, Beijing 100050, P.R.China.

**\*Corresponding author:** Yong-Su Zhen

E-mail: [zhenys@imb.pumc.edu.cn](mailto:zhenys@imb.pumc.edu.cn)

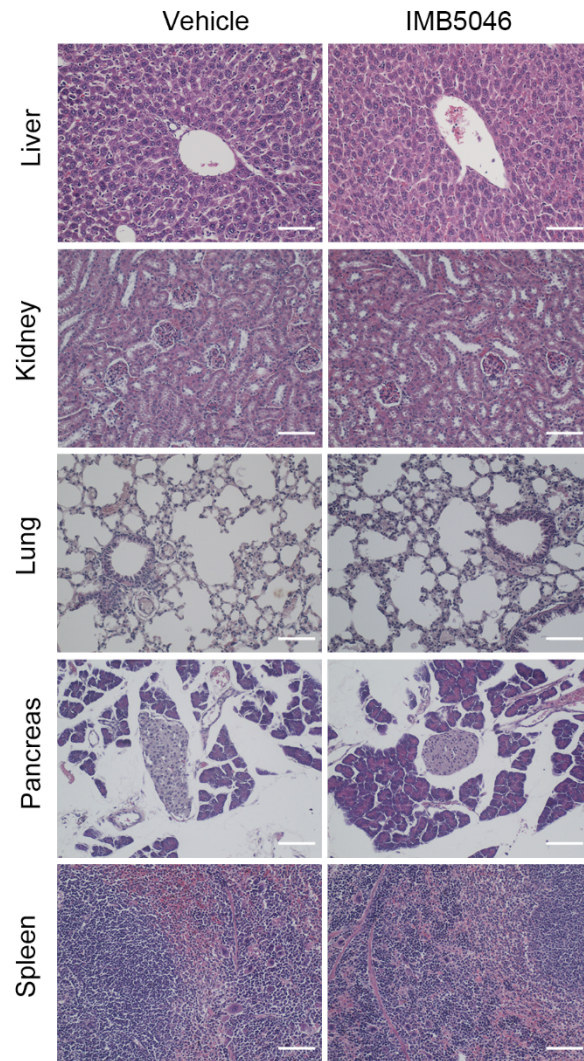

**Supplementary Figure S1. Histopathological examination of mice treated with IMB5046.** No histopathological changes were found in liver, kidney, lung, pancreas and spleen (hematoxylin and eosin stain). Scale bar, 50  $\mu\text{m}$ .
